# Supplementary material for: Graphitic C3N4as a powerful catalyst for all-vanadium redox flow batteries
Source: Royal Society of Chemistry journal article supplement (doi:10.1039/c6ra11381h), 2016-01-01
Supplement: c6ra11381h1.pdf [file c6ra11381h1.pdf]

## Supporting information

### Graphitic C<sub>3</sub>N<sub>4</sub> as Powerful Catalysts for All-Vanadium Redox Flow Batteries

Yuqing Huang<sup>1</sup>, Jia Huo, Shou Dou, Kui Hu, and Shuangyin Wang<sup>\*,1</sup>

<sup>1</sup>State Key Laboratory of Chem/Bio-Sensing and Chemometrics, College of Chemistry and Chemical Engineering, Hunan University, Changsha, 410082, P. R. China;

Email: [shuangyinwang@hnu.edu.cn](mailto:shuangyinwang@hnu.edu.cn) (S. Wang)

| Sample                            | I <sub>pa</sub> (mA) | I <sub>pc</sub> (mA) | V <sub>pa</sub> (V) | V <sub>pc</sub> (V) | I <sub>pa</sub> /I <sub>pc</sub> | ΔE(V) |
|-----------------------------------|----------------------|----------------------|---------------------|---------------------|----------------------------------|-------|
| Pure                              | 10.50                | 5.48                 | 1.18                | 0.59                | 1.92                             | 0.59  |
| C <sub>3</sub> N <sub>4</sub> -CF | 12.95                | 13.84                | 0.91                | 0.76                | 0.93                             | 0.16  |

Table S1. Electrochemical properties a obtained from cyclic voltammetry results for untreated and different Electrodes at a Scan Rate of 1mV s<sup>-1</sup>.

| Sample                            | R <sub>S</sub> | Q <sub>m</sub> |       | R <sub>p</sub> | Q <sub>t</sub> |       |
|-----------------------------------|----------------|----------------|-------|----------------|----------------|-------|
|                                   |                | Y1(mMho)       | N1    |                | Y2(Mho)        | N2    |
| Pure                              | 1.64           | 0.722          | 0.915 | 53.1           | 0.68           | 0.732 |
| C <sub>3</sub> N <sub>4</sub> -CF | 1.53           | 1.10           | 0.925 | 23.9           | 1.35           | 0.828 |

Table S2. Fit Parameters Resulting from the Equivalent Circuit Model in Figure 4.

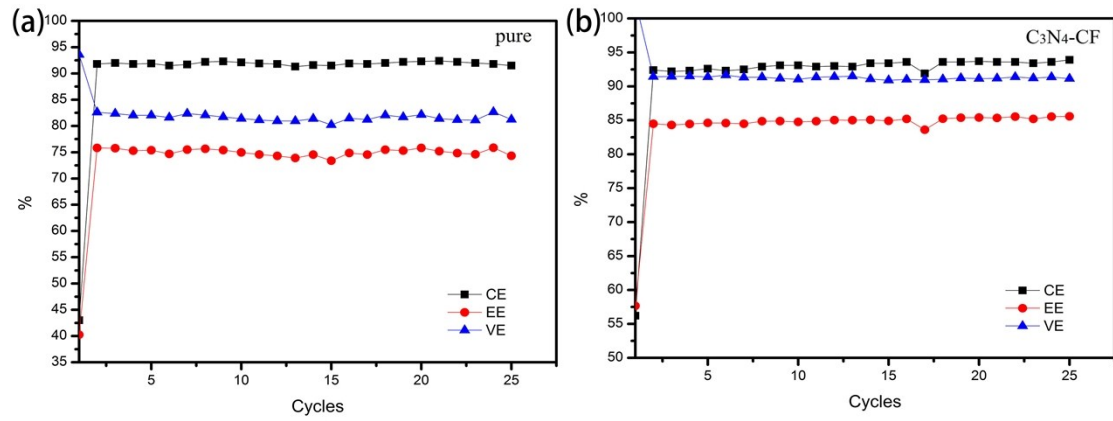

Fig. S1 CE, VE, EE data of cell with pure CF (a) and C<sub>3</sub>N<sub>4</sub>-CF(b) at the current density of 50 mA cm<sup>-2</sup> for 25 charge-discharge cycles.

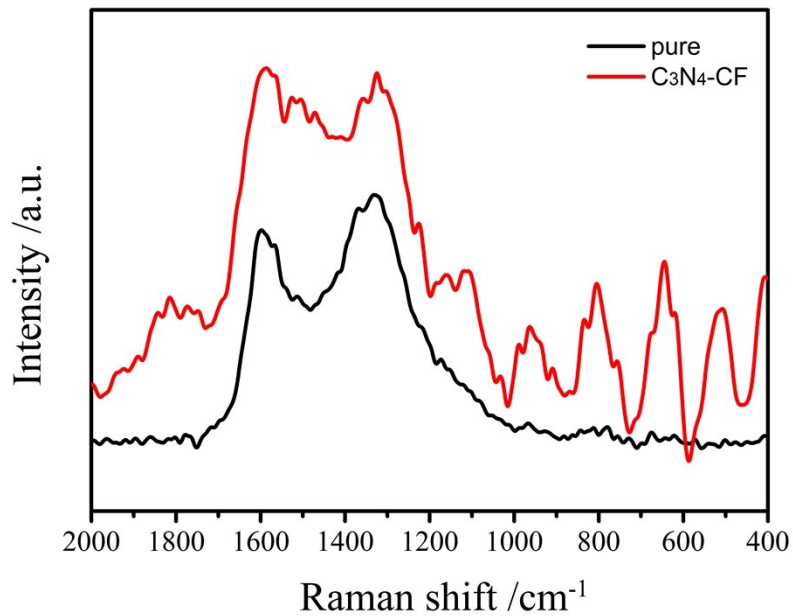

Fig. S2 Raman spectroscopy of C<sub>3</sub>N<sub>4</sub>-CF electrode.

Raman spectroscopy results showed that the existence of C<sub>3</sub>N<sub>4</sub>.

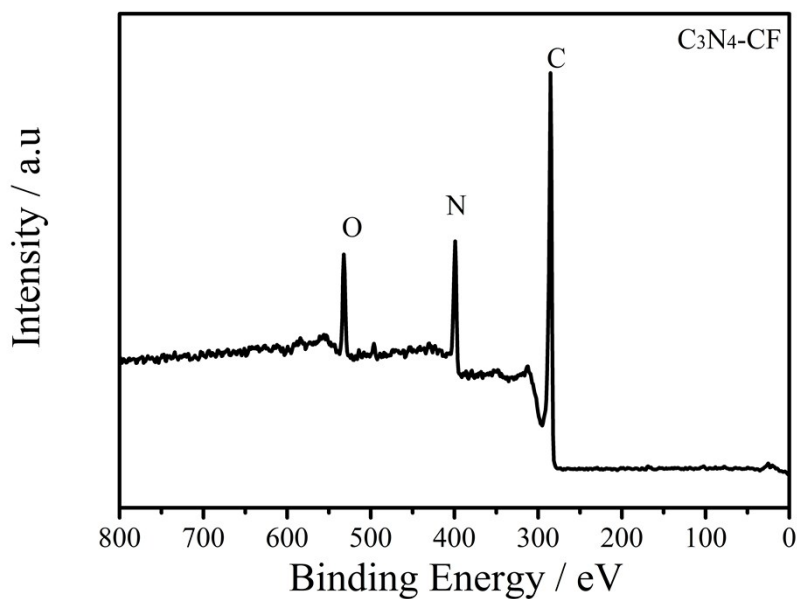

Fig. S3 XPS spectrum of g-C<sub>3</sub>N<sub>4</sub>

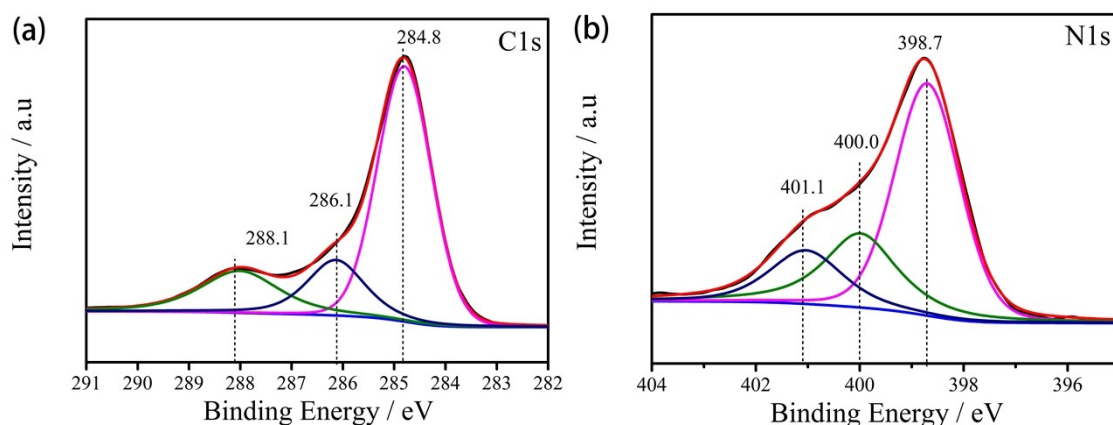

Fig. S4 C1s (a) and N1s (b) XPS spectra of the g-C<sub>3</sub>N<sub>4</sub>

In Figure S3(a), the peak at 284.8 eV belongs to C-C coordination, and the peak centered at 288.1 eV corresponds to C-N coordination of C<sub>3</sub>N<sub>4</sub>-CF<sup>1</sup>, and there is another peak at around 286.1 eV could be attributed to the C-NH<sub>2</sub> species of the C<sub>3</sub>N<sub>4</sub>-CF. In addition, the sample exhibit N1s profiles at 398.7, 400.0 and 401.1 eV which can be attributed to sp<sup>2</sup>-hybridized nitrogen (C-N-C), sp<sup>3</sup>-hybridized nitrogen (N-[C]<sub>3</sub>) and amino functional groups with a hydrogen atom (C-NH), respectively. The results demonstrate the presence of C<sub>3</sub>N<sub>4</sub> surface in the CF.

1. Y. Zhao, F. Zhao, X. Wang, C. Xu, Z. Zhang, G. Shi and L. Qu, *Angew Chem Int Ed Engl*, 2014, **53**, 13934-13939.
